# Supplementary material for: Effects of gallium and clove oil embedded in porous phosphate coacervate glass fibres on wound healing
Source: Royal Society of Chemistry journal article supplement (doi:10.1039/d6ma00177g), 2026-06-11
Supplement: d6ma00177g1.pdf [file d6ma00177g1.pdf]

### Supporting Information

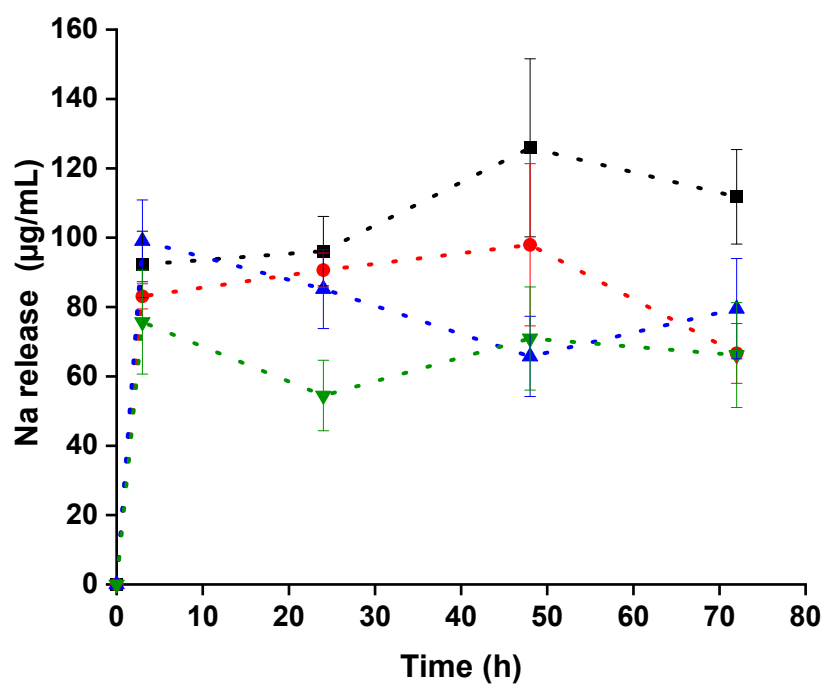

Figure SI\_1. Release of Na after PGF-unl and PGFs-GaX immersion in DI water up to 72 h.

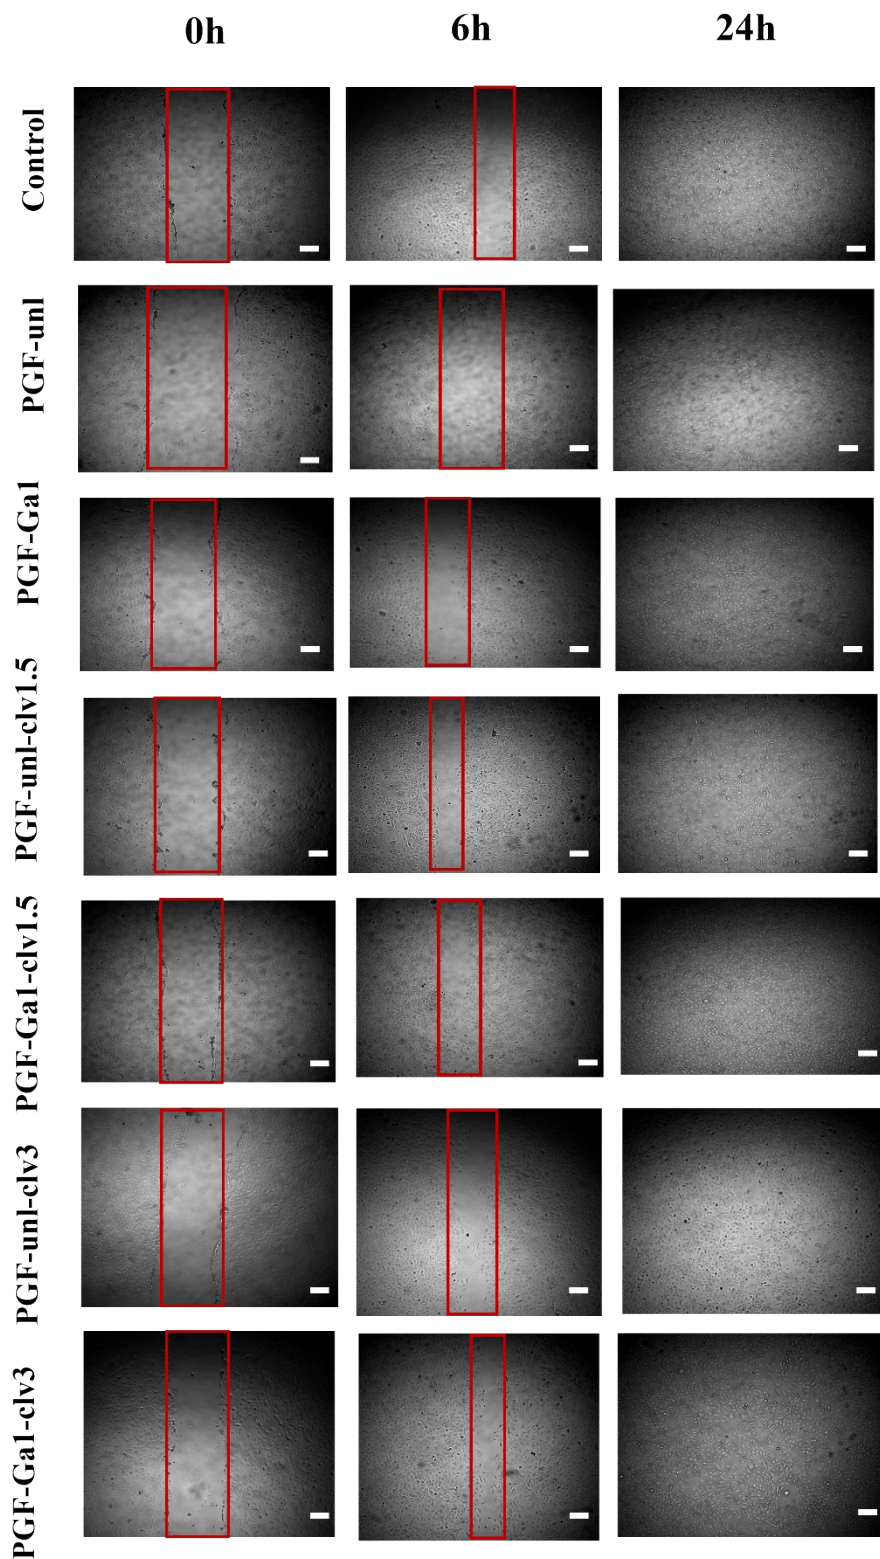

Figure SI\_2. *In vitro* monolayer scratch assay of untreated MC3T3-L1-E1 (control) and those treated with PGF-unl, PGF-Ga1, PGF-unl-clv1.5, PGF-Ga1-clv1.5, PGF-unl-clv3, PGF-Ga1-clv3 after 6 and 24 h. Scale bar: 200  $\mu$ m

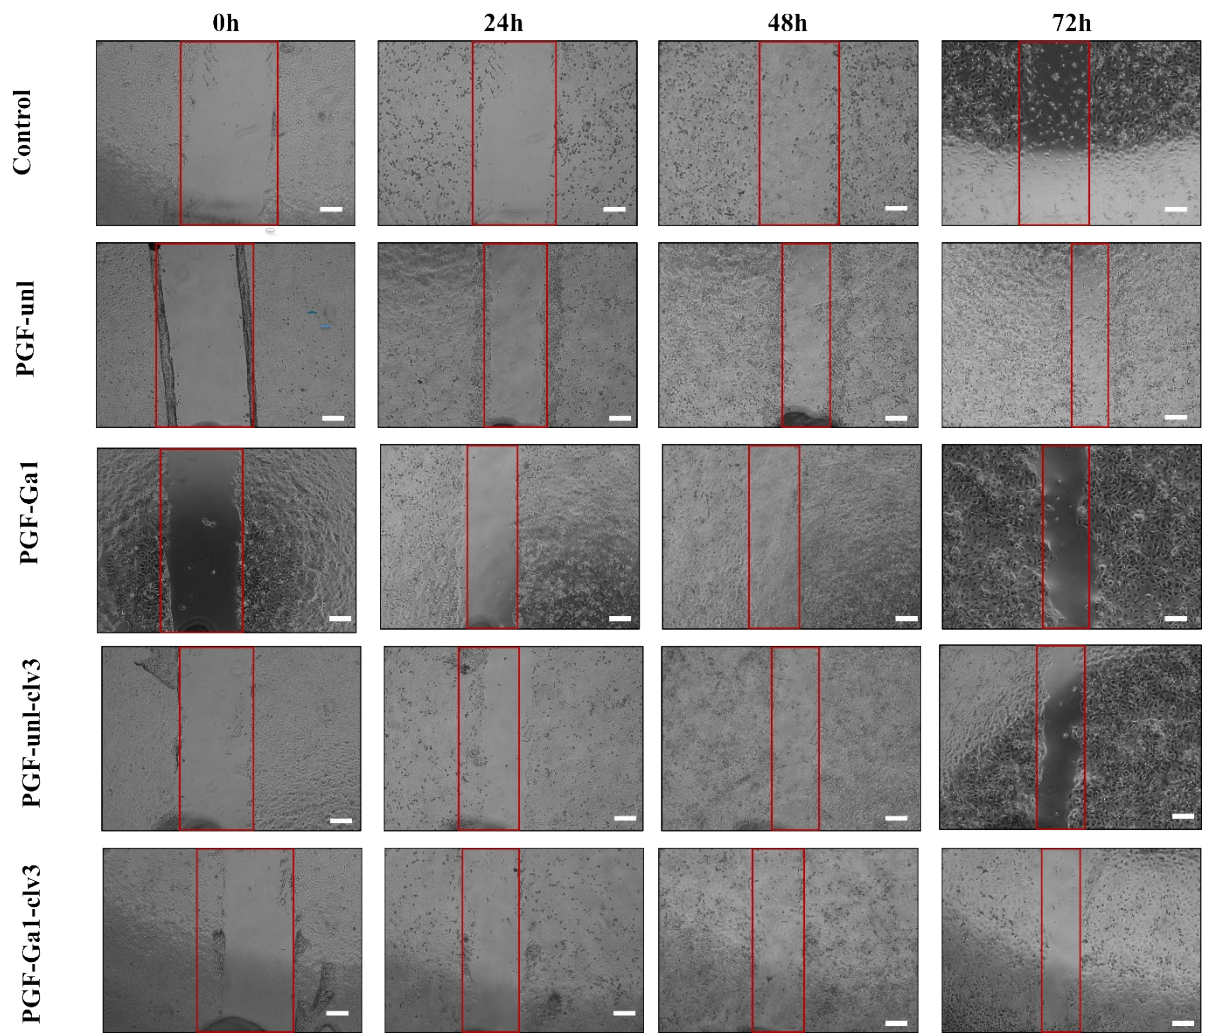

*Figure SI\_3. In vitro monolayer scratch assay of untreated HaCaTs (control) and those treated with PGF-unl, PGF-Ga1, PGF-unl-clv3 and PGF-Ga1-clv3 after 24, 48 and 72 h. Scale bars: 200  $\mu$ m*

Table S1. Scratch width and percentage of wound closure for MC3T3-L1-E1 in contact with PGF dissolution products.

| <b>Sample</b>  | <b>Scratch width (0 h, <math>\mu\text{m}</math>)</b> | <b>Scratch width (6 h, <math>\mu\text{m}</math>)</b> | <b>% Closure (6 h)</b> | <b>% Closure (24 h)</b> |
|----------------|------------------------------------------------------|------------------------------------------------------|------------------------|-------------------------|
| Control        | 650                                                  | 393                                                  | 39 %                   | 100 %                   |
| PGF-unl        | 882                                                  | 702                                                  | 20 %                   | 100 %                   |
| PGF-Ga1        | 713                                                  | 450                                                  | 33 %                   | 100 %                   |
| PGF-unl-clv1.5 | 614                                                  | 428                                                  | 30 %                   | 100 %                   |
| PGF-Ga1-clv1.5 | 588                                                  | 291                                                  | 50 %                   | 100 %                   |
| PGF-unl-clv3   | 632                                                  | 324                                                  | 48 %                   | 100 %                   |
| PGF-Ga1-clv3   | 545                                                  | 264                                                  | 51 %                   | 100 %                   |
